# Supplementary material for: Dissecting infant leukemia developmental origins with a hemogenic gastruloid model
Source: eLife journal article supplement (doi:10.7554/elife.102324), 2025-02-03
Supplement: fig4-data2 [file elife-102324-fig4-data2-v1.zip]

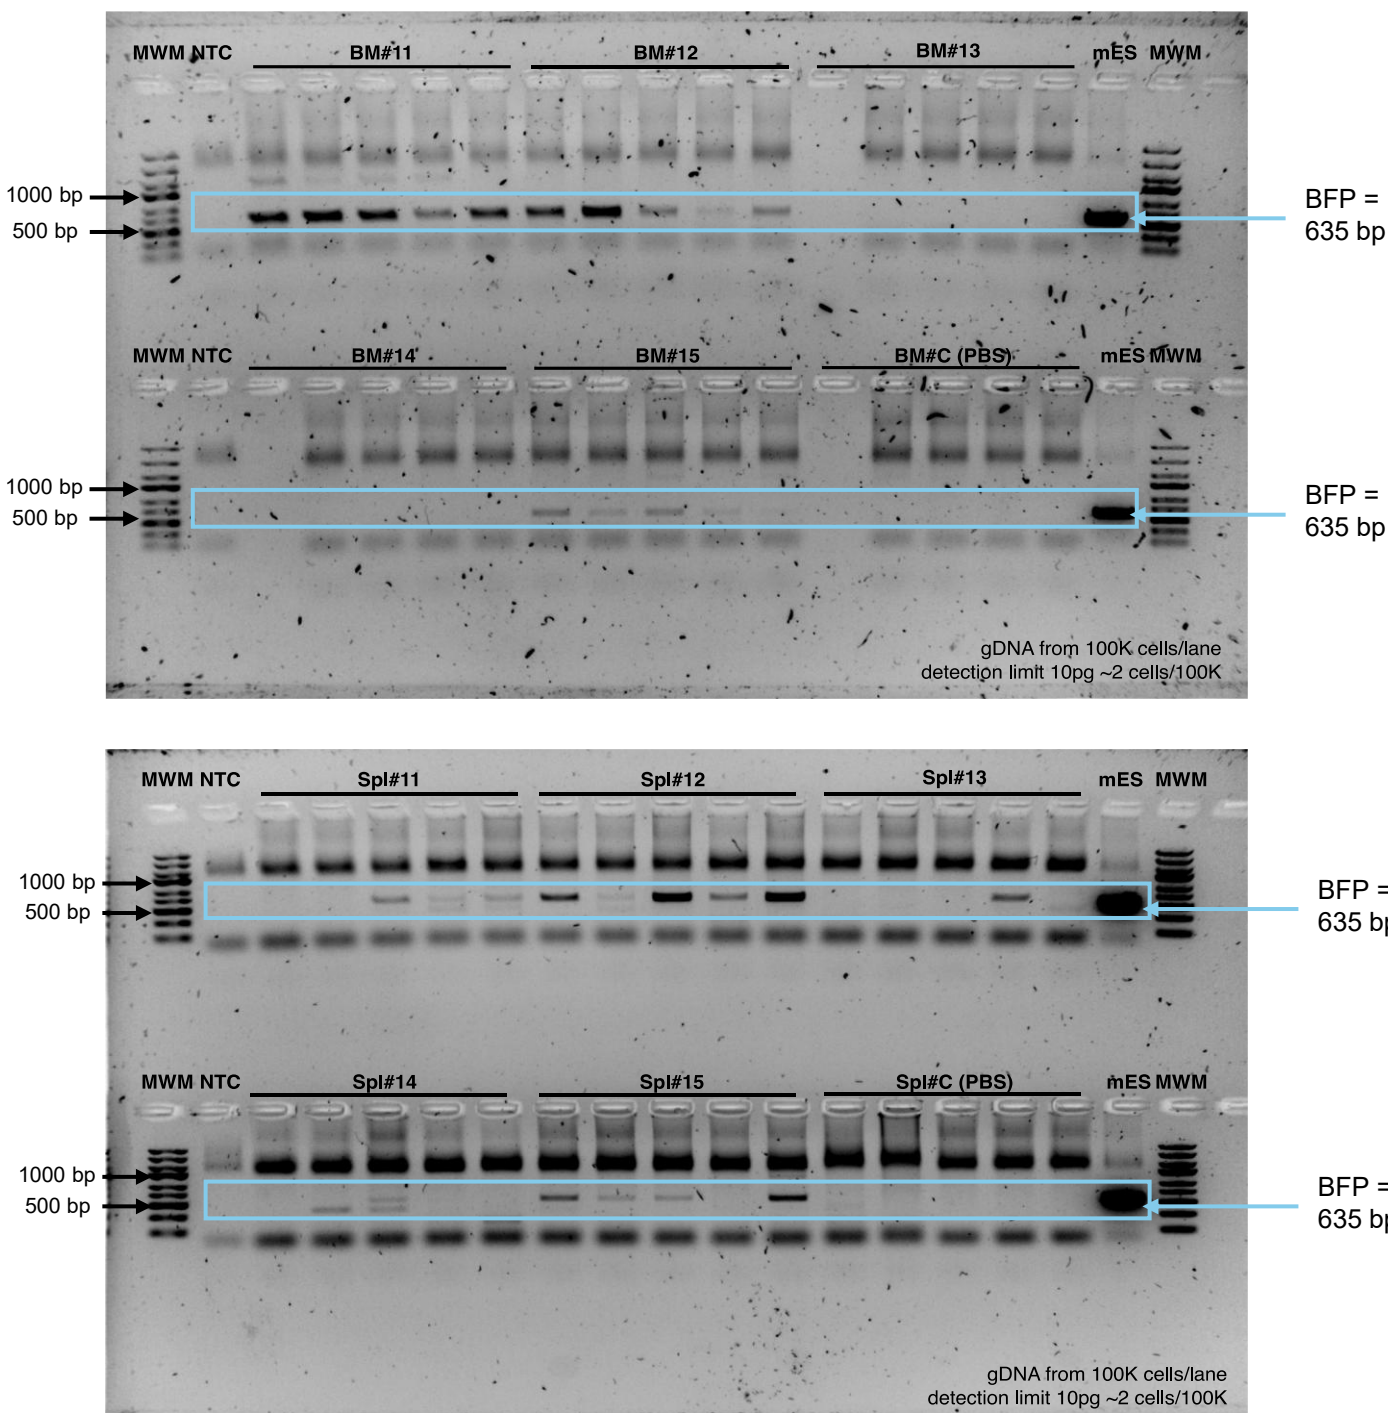

## Figure 4 – source data

Uncropped gel electrophoresis corresponding to Figure 4C – top : bone marrow (BM); bottom : spleen (Spl). MWM : molecular weight marker.

PCR detection of haemGx genomic (g)DNA in the bone marrow (BM) and spleen (Spl) of immunodeficient mice 4 weeks after unilateral adrenal implantation of 3 gastruloids/gland. Analysis of 5 replicates of 100ng gDNA/recipient tissue; control animal was injected unilaterally with PBS in an adrenal gland in parallel with experimental implantation. Reaction positive control used 100ng of gDNA from *Rosa26-BFP::Flk1-GFP* mES cells (mES) used to generate haemGxs. NTC: no template control.
